# Supplementary material for: Genetic polymorphisms of PGF and TNFAIP2 genes related to cervical cancer risk among Uygur females from China
Source: BMC Med Genet. 2020 Oct 27;21:212. doi: 10.1186/s12881-020-01144-5 (PMC7590450; doi:10.1186/s12881-020-01144-5)
Supplement: Supplementary file 2 — Additional file 2. [file 12881_2020_1144_MOESM2_ESM.xlsx]

## Sheet: Sheet1
rs2268615	rs710100	rs8019391	class
CC	GA	CT	case
CC	GA	CT	case
CA	GA	CT	case
CA	GA	CT	case
CA	GA	CT	case
CA	GA	CT	case
AA	GG	CC	case
AA	GG	CC	case
CA	GA	CC	case
CA	GA	CC	case
CA	GA	CC	case
CA	GA	CC	case
CA	GG	CC	case
CA	GG	CC	case
CA	AA	CC	case
CA	AA	CC	case
CA	GG	CC	case
CA	GG	CC	case
CC	GG	CC	case
CC	GG	CC	case
CC	GA	CC	case
CC	GA	CC	case
CC	GG	CC	case
CC	GG	CC	case
CC	AA	CT	case
CC	AA	CT	case
CC	GA	CC	case
CC	GA	CC	case
CC	GA	CC	case
CC	GG	CC	case
CC	GG	CC	case
CC	GA	CC	case
CC	GA	CC	case
CA	GA	CT	case
CA	GA	CT	case
CC	GG	CT	case
CC	GG	CT	case
CC	GA	CC	case
CC	GA	CC	case
CC	GA	TT	case
CC	GA	TT	case
CC	GA	CC	case
CC	GA	CC	case
CC	GG	CT	case
CC	GG	CT	case
CA	GA	CC	case
CA	GA	CC	case
CA	GG	CC	case
CA	GG	CC	case
CA	AA	CT	case
CA	AA	CT	case
CC	GA	CC	case
CC	GA	CC	case
CA	GA	CC	case
CC	GA	CT	case
CC	GG	CC	case
CC	GA	CT	case
CC	GG	CT	case
CC	GA	CT	case
CC	GA	CT	case
CA	GA	CC	case
CA	GA	CC	case
CC	GA	CT	case
CC	GA	CT	case
CA	GA	CT	case
CA	GA	CT	case
CA	GA	CC	case
CA	GA	CC	case
CC	GA	CC	case
CC	GA	CC	case
CA	GG	CC	case
CA	GG	CC	case
CC	GG	TT	case
CC	GG	TT	case
CC	GA	CC	case
CC	GA	CC	case
CC	GG	CC	case
CC	GG	CC	case
CA	GA	CT	case
CA	GA	CT	case
CA	GA	CC	case
CA	GA	CC	case
CC	GA	CC	case
CC	GA	CC	case
CC	GG	CC	case
CC	GG	CC	case
CC	GG	CT	case
CC	GG	CT	case
CC	GG	CC	case
CC	GG	CC	case
CA	GG	CC	case
CA	GG	CC	case
CA	GA	CT	case
CA	GA	CT	case
CA	AA	CC	case
CA	AA	CC	case
CA	AA	CC	case
CA	AA	CC	case
CA	GA	CT	case
CA	GA	CT	case
CC	AA	CC	case
CC	GG	CT	case
CC	GG	CT	case
CA	GA	CC	case
CA	GA	CC	case
AA	GG	CC	case
CA	GA	CC	case
CC	GG	CT	case
CA	GA	CT	case
CA	AA	CT	case
CC	GG	CC	case
CC	GA	CC	case
CC	GA	CC	case
CA	GG	CC	case
CC	GA	CC	case
CC	GA	CT	case
CC	GA	CC	case
AA	GG	CC	case
CA	GA	CT	case
CC	GG	CC	case
CA	GA	CT	case
CA	GG	CC	case
CC	GG	CC	case
CA	AA	CC	case
CA	GA	CC	case
CC	GG	CC	case
CA	GA	CC	case
CC	GG	CT	case
CC	GG	CC	case
CC	GG	CT	case
CA	AA	CT	case
CC	GA	CT	case
CC	GG	CT	case
CC	GG	CC	case
CA	AA	CC	case
CA	GG	CC	case
CA	GG	CT	case
CC	GA	CT	case
CC	GG	CC	case
CA	AA	CC	case
CC	GA	CC	case
CA	GA	CT	case
CC	GG	TT	case
CA	GA	CT	case
AA	GG	CT	case
CC	AA	CC	case
CC	AA	CC	case
AA	AA	CC	case
CA	GG	CT	case
CC	GG	CC	case
CA	AA	CC	case
CA	GG	CT	case
CC	GA	CT	case
CC	GA	CT	case
CC	GG	CC	case
CC	GG	CC	case
CC	AA	TT	case
CA	AA	CT	case
AA	GG	CC	case
CC	GG	CC	case
CC	AA	CT	case
CA	GG	CC	case
CA	GA	CC	case
CA	GA	CC	case
CC	AA	TT	case
CA	GA	CT	case
AA	GG	CC	case
CA	GA	CT	case
CA	GA	CT	case
CC	GG	CT	case
CA	GG	CC	case
AA	GA	CC	case
CC	GA	CT	case
CA	GA	CC	case
CA	GA	CC	case
CC	AA	CC	case
CA	GG	CC	case
CA	AA	CC	case
AA	GG	CT	case
CC	GA	CT	case
CA	GA	CC	case
CA	GA	CC	case
CA	GA	CT	case
CA	AA	CC	case
CC	GG	CT	case
CA	GG	CT	case
CC	GA	CC	case
CC	GA	CC	case
CC	GA	CC	case
CA	GA	CC	case
CA	GG	CC	case
CC	GA	CC	case
CC	AA	TT	case
AA	GG	CC	case
CC	GA	CT	case
CA	AA	CC	case
CC	GG	TT	case
CA	GG	CC	case
CA	GA	CC	case
CA	AA	CT	case
CC	AA	CC	case
CC	AA	CC	case
CA	AA	CC	case
CA	GA	CC	case
CA	GA	CC	case
CA	GA	CC	case
AA	GA	CT	case
AA	GA	CC	case
CC	GG	CC	case
CA	GG	CC	case
CC	GG	CT	case
AA	GG	CT	case
CC	GG	CC	case
CA	GA	CT	case
CA	GA	CT	case
CC	GG	CC	case
CA	GA	CT	case
CC	GG	CT	case
CA	GG	CT	case
AA	GA	CC	case
CC	GG	CC	case
CC	GA	CT	case
AA	GA	CC	case
AA	GG	CT	case
CC	AA	CC	case
CA	GG	CC	case
CA	GG	CC	case
CA	GA	CC	case
CC	GA	CC	case
CC	GA	CC	case
CA	GG	CC	case
CA	GG	CT	case
CA	AA	CT	case
CC	GA	CT	case
CC	GG	CC	case
CA	GG	TT	case
AA	GA	CT	case
AA	GA	CT	case
CC	AA	CT	case
CC	GA	CT	case
CC	GA	CT	case
CC	GA	CC	case
CC	GA	TT	case
CC	GG	CC	case
CA	GA	CT	case
CC	GG	CT	case
CA	GA	CT	case
CC	AA	CC	case
CA	GG	CC	case
CC	GA	CT	case
CA	GG	CC	case
CA	GA	CT	case
CA	GA	CC	case
CA	GA	CC	case
CA	GA	CC	case
CC	GA	TT	case
CA	AA	CT	case
AA	GA	CC	case
AA	AA	CC	case
CC	GG	CC	case
CA	GG	CC	case
AA	GA	CT	case
AA	GA	TT	case
CA	AA	CC	case
CA	GA	CC	case
CC	GG	CC	case
CC	GA	TT	case
CA	GA	CC	case
CA	GA	CC	case
CA	GA	CC	case
CA	AA	CT	case
CA	GG	CC	case
CC	GA	CT	case
CC	GA	CT	case
CA	GA	CT	case
CC	GG	CC	case
CA	GA	CT	case
CA	GA	CC	case
CA	GA	CC	case
AA	GA	CC	case
CA	GA	CC	case
CC	AA	CC	case
CA	GA	CC	case
CC	GA	CC	case
CC	GA	CT	case
CC	GA	CC	case
CC	AA	CC	case
CC	GG	CC	case
CC	AA	CC	case
AA	GA	CC	case
CA	GA	CC	case
CA	GA	CC	case
CC	GA	CT	case
CA	GA	CT	case
CA	GA	CC	case
CA	GA	CT	case
CC	GA	CC	case
CA	GA	CC	case
AA	GG	CT	case
CA	GG	TT	case
CA	GG	CC	case
CA	GG	CT	case
CC	GA	CT	case
CA	GG	CC	case
CA	GG	CT	case
CC	GG	CC	case
CC	GG	CC	case
CA	GA	CC	case
CC	GA	CC	case
CA	GG	CC	case
CA	GA	CC	case
CA	AA	CT	case
CC	GA	CC	case
CC	GG	CC	case
CC	GA	CC	case
CA	GG	CC	case
CA	AA	CT	case
CC	GG	CC	case
CA	AA	CC	case
CA	GG	CT	case
CA	GA	CT	case
CA	GG	CC	case
CC	AA	CT	case
CC	GA	CC	case
CA	AA	CC	case
CA	AA	CC	case
CC	GA	CT	case
CC	GA	CT	case
CC	GA	CT	case
CC	GG	CC	case
CC	AA	CC	case
CC	GA	CT	case
CC	GA	CT	case
CC	GA	CT	case
CA	GA	CC	case
CC	GG	CT	case
CA	GA	CC	case
CA	GA	CC	case
CA	GG	CC	case
CC	GG	CC	case
CC	AA	CC	case
CC	AA	CC	case
CA	GG	CC	control
CA	GA	CC	control
AA	GG	CT	control
CA	GG	CT	control
CA	GA	CC	control
CC	GA	CT	control
CC	GA	CT	control
CA	GG	CT	control
CC	GG	CC	control
CC	GG	CT	control
CA	GA	CC	control
CA	GA	CC	control
CA	GA	CC	control
CA	AA	CC	control
CA	GG	CC	control
CC	GA	CT	control
CA	GG	CC	control
CA	GG	CT	control
CC	GA	CC	control
CA	AA	CC	control
CA	GG	CC	control
CC	GA	CC	control
	GA	CC	control
CC	AA	CC	control
CA	GA	CT	control
CA	GG	CT	control
CA	GA	CT	control
CC	GA	CC	control
CA	AA	CC	control
AA	GA	CC	control
CA	GG	CT	control
CA	GA	CT	control
CC	GA	TT	control
CA	AA	CC	control
CA	GA	CT	control
CC	GA	CC	control
CA	AA	CC	control
CC	AA	CT	control
CA	GG	CC	control
CC	GG	CT	control
CC	GA	CC	control
CA	GA	CT	control
CC	AA	CC	control
CA	GA	CC	control
CC	GA	CC	control
CA	GG	CC	control
CC	GA	CC	control
CA	GA	CC	control
CC	GG	CC	control
CA	GA	CC	control
CA	GA	CT	control
CA	GA	CC	control
CC	GA	CC	control
CC	GG	CT	control
CA	AA	CC	control
CC	GA	TT	control
CA	GA	CT	control
AA	GG	CC	control
CC	GG	CC	control
AA	AA	CC	control
CA	GA	CC	control
CA	GG	CC	control
CC	GG	CC	control
AA	GG	CT	control
CC	GG	CC	control
CA	GG	CC	control
CA	AA	CC	control
CA	GG	CC	control
CA	GA	CT	control
CC	GG	CC	control
CC	GG	CC	control
CC	GA	CT	control
CC	GA	CT	control
CA	GA	CC	control
CA	GG	CC	control
CC	GA	CT	control
CC	GG	CT	control
CA	GA	CC	control
CC	GG	CT	control
CC	GA	CC	control
CC	GA	CC	control
CC	GG	CC	control
CC	GA	CC	control
CC	GG	CC	control
CA	AA	CC	control
CA	AA	CC	control
CC	GA	CC	control
CC	GA	CT	control
CC	AA	CC	control
CA	AA	CT	control
CC	GG	CC	control
CC	GG	CC	control
CC		CC	control
CC	GA	CC	control
CC	AA	CC	control
CC	GA	CC	control
CA	GG	CC	control
CA	GG	CC	control
CC	GA	CC	control
CA	AA	CC	control
CA	GG	CC	control
CC	GA	CC	control
AA	AA	CC	control
CC	GA	CC	control
CC	GA	CT	control
AA	AA	CT	control
CC	GG	CC	control
CC	AA	CC	control
CC	GG	CC	control
AA	GG	CT	control
CA	GA	CT	control
CA	GA	CC	control
CA	AA	CC	control
CC	AA	CC	control
CC	GA	CC	control
CC	GG	CT	control
CA	GA	CT	control
AA	GA	CC	control
CC	GG	CC	control
CA	GG	CC	control
CA	GG	CT	control
CC	GA	CT	control
CC	GA	CC	control
CA	GA	CT	control
CC	GG	CC	control
CC	GG	CC	control
AA	GG	CC	control
CA	AA	CT	control
CC	GA	CC	control
CC	AA	CC	control
CA	GA	CC	control
CC	GA	CC	control
CA	GG	CC	control
CC	GG	CC	control
CA		CC	control
AA	GA	CT	control
CA	AA	CC	control
CC	GA	CC	control
CA	GA	CC	control
CA	GA	CT	control
CC	GG	CC	control
CA	GA	CC	control
CC	AA	CT	control
AA	GA	CC	control
AA	GG	CC	control
CA	GG	CC	control
AA	GG	CC	control
CC	GG	CC	control
CA	GA	CC	control
CA	GA	CC	control
AA	GG	TT	control
CC	GA	CC	control
CC	GG	CC	control
CA		CC	control
CC	GG	CC	control
CC	GG	CC	control
CC	GA	CC	control
CC	GA	CT	control
CC	GG	CC	control
CA	AA	CT	control
CA	GA	CC	control
CC	GA	CC	control
CC	GA	CC	control
CC	GG	CT	control
CC	AA	CC	control
CA	GA	CT	control
CC	GA	CC	control
CA	AA	CT	control
CC	GA	CT	control
CA	GA	CC	control
CA	GG	CC	control
CA	GA	CC	control
CC	GA	CC	control
CC	GA	CT	control
CC	GA	CT	control
CC	GG	CC	control
CC	GA	TT	control
CC	GG	CC	control
CC	GA	CT	control
CA	GG	CC	control
CC	GA	CT	control
CA	GG	CC	control
CC	GA	CC	control
CC	AA	CC	control
CA	GG	CT	control
CA	AA	CT	control
CC	GG	CC	control
CC	GG	CC	control
CC	GG	CC	control
CC	GG	CC	control
CC	GA	CC	control
CC	GG	CC	control
CA	GA	CC	control
CA	GA	CC	control
AA	GG	CC	control
CA	GA	CC	control
CC	GA	CC	control
CC	GG	CT	control
CA	GA	CT	control
CC	GA	CC	control
CC	GA	CC	control
	GG	CT	control
CC	GG	CC	control
CC	GA	CC	control
CC	GG	CT	control
CC	GA	TT	control
CA	GG	CC	control
CC	GA	CT	control
CC	GA	CC	control
CC	GA	CC	control
CC	GA	CC	control
CC	GG	CT	control
CA	GG	CC	control
CC	GG	CC	control
CC	AA	CC	control
AA	GA	CC	control
CA	GG	CC	control
CA	GG	CC	control
CC	GA	CC	control
CA	GG	TT	control
CC	GA	CC	control
CC	GG	CT	control
AA	GA	CC	control
CA	GG	CC	control
CA	GG	CC	control
CC	GG	CT	control
CA	AA	CC	control
CC	GG	CT	control
CC	GG	CC	control
CC	GA	CC	control
CA	GA	CC	control
CA	GA	TT	control
CC	GG	CT	control
CA	GG	CT	control
CC	GG	CC	control
CC	GG	CC	control
CC	GG	CC	control
CC	AA	CT	control
CA	GG	CT	control
CA	GA	CC	control
CC	AA	CT	control
CC	GG	CT	control
CC	GG	CT	control
CC	GG	CC	control
CC	GG	CT	control
CA	GG	CC	control
CC	GA	CC	control
AA	GG	CT	control
CA	GG	CT	control
CC	GG	CT	control
CC	GG	CC	control
CA	AA	CC	control
CC	GG	CT	control
CC	GG	CT	control
CC	GA	CC	control
CA	GA	CC	control
CA	GG	CC	control
CC	GA	CC	control
CA	GG	CC	control
CC	AA	CT	control
CC	GA	CC	control
CA	GG	CT	control
CC	GA	CC	control
CA	GG	CC	control
CA	GG	CC	control
CA	GA	CT	control
CC	GA	CC	control
CC	GG	CC	control
CA	GG	CC	control
CC	GA	CC	control
CA	GA	CT	control
CA	GA	CT	control
CC	GA	CT	control
CC	GA	CC	control
AA	GG	CC	control
CC	GA	CT	control
CC	AA	CC	control
CA	GG	TT	control
CC	GG	CT	control
CA	GG	TT	control
CC	AA	CC	control
CC	GG	CC	control
CC	GG	CT	control
CC	GA	TT	control
CC	GG	CT	control
CA	GA	CC	control
CA	GA	TT	control
CA	GA	CC	control
CC	GG	CT	control
CC	GA	CC	control
CC	GG	CC	control
CC	GA	CC	control
CC	AA	TT	control
CA	AA	CT	control
CA	GG	CC	control
CA	AA	CT	control
CA	GG	CC	control
CC	GA	CT	control
CC	GA	CC	control
CA	AA	CC	control
CC	GG	TT	control
CC	GA	CT	control
CC	GA	CC	control
CA	GA	CC	control
AA	GG	CC	control
AA	GG	CT	control
CC	GA	CT	control
CA	AA	CC	control
CC	GG	CT	control
	GG	TT	control
CA	GG	CC	control
CC	GG	CC	control
CC	AA	CC	control
CA	GG	CT	control
CA	GG	TT	control
CA	AA	CC	control
CC	GG	CC	control
CA	GG	CC	control
CA	GA	CT	control
CC	GA	CC	control
CA	GG	CC	control
CA	GA	CT	control
CC		CT	control
CC	AA	CC	control
CC	GG	CC	control
CA	GA	CT	control
CA	GG	CC	control
CA	GG	CC	control
CC	GA	CC	control
CA	GG	CC	control
CC	GG	CC	control
CA	GA	CC	control
CC	GG	CC	control
CC	GA	CT	control
CC	GG	CT	control
CA	GA	CC	control
CC	GG	CC	control
CA	GG	CC	control
CC	GA	CC	control
CC	GA	CT	control
AA	GG	CT	control
CC	GA	CC	control
CC	GA	CC	control
CA	GA	CT	control
CC	GA	CT	control
CA	GG	CT	control
CC	AA	CC	control
CC	GA	CC	control
CC	GA	CC	control
CA	GA	CC	control
CC	GG	CC	control
CA	GA	CT	control
CC	GA	CC	control
CC	GA	CC	control
CC	GA	CC	control
CC	GG	CC	control
CC	GG	CC	control
CC	GA	CC	control
CC	GA	CT	control
CC	GG	CC	control
CC	GG	CC	control
CC	GG	CT	control
CA	GA	CT	control
CA	GA	CC	control
AA	GG	CC	control
AA	GG	CT	control
AA	GG	CC	control
CA	GA	CC	control
CA	AA	CT	control
CC		CC	control
CC		CC	control
CC	GA	CC	control
CC	GG	CC	control
CA	GA	CC	control
CA	AA	CC	control
CC	GA	CC	control
CA	GG	CC	control
CA	GG	CC	control
CC	GG	CC	control
CA	GG	CC	control
CA	AA	CT	control
CA	GG	CT	control
CC	GA	CT	control
CC	GG	CC	control
CC	GG	CT	control
CC	GA	CT	control
CC	GA	CT	control
CA	GG	CT	control
CA	GA	CC	control
CA	GG	CC	control
CA	GG	CT	control
CC	GG	CT	control
CA	GA	CT	control
CC	GG	TT	control
CC	GA	CC	control
CC	GA	CC	control
CC	GA	CC	control
CA	GG	TT	control
CC	GG	CC	control
CA	GG	CC	control
CA	GA	CC	control
CA	GG	CT	control
CC	GG	CC	control
CC	GG	CT	control
CA	GG	CC	control
CC	GG	CC	control
CC		CC	control
CC	GG	CT	control
CC	GA	TT	control
CC	GG	CC	control
CC	GA	CC	control
AA	GG	CT	control
CC	AA	CC	control
AA	GG	CC	control
CA	GA	CC	control
CC	AA	CC	control
CC	GA	CC	control
CC	GG	TT	control
CA	GG	CC	control
CC	AA	CT	control
CC	GG	CC	control
CC	GA	CC	control
CA	GA	CT	control
CA	AA	CC	control
CC	GA	CT	control
CC	GA	CC	control
CA	AA	CT	control
CC	GA	CC	control
CC	GG	CC	control
CA	GA	CC	control
CA	GG	CC	control
CC	GA	CC	control
CA	GG	CC	control
CC	GA	CC	control
CC	GA	CC	control
AA	GG	TT	control
CC	GG	CC	control
CA	AA	CC	control
CC	AA	CC	control
CC	AA	CC	control
CC		CC	control
CC	GG	CC	control
CC	GA	CC	control
CC	GA	CC	control
CC	GA	CT	control
CC	GG	CC	control
CA	GG	TT	control
CC	GA	TT	control
CC	AA	CC	control
CC	GG	CT	control
CA	GG	CT	control
CC	GA	CC	control
CC	GG	CC	control
CA	AA	CT	control
CC	GA	CT	control
CC	GA	CC	control
CC	GG	CT	control
CC	GG	CC	control
CA	GA	CC	control
AA	GA	CC	control
CA	GG	TT	control
CC	GA	CC	control
CC	GA	TT	control
AA	GG	TT	control
CC	GA	CC	control
CC	GG	CC	control
CC	GA	CC	control
CC	GA	CC	control
CC	AA	CC	control
CC	GA	CC	control
CA	GA	CC	control
CC	GG	CC	control
CA	GG	CC	control
CA	GA	CT	control
CC	AA	CC	control
CA	GG	CT	control
CC	GG	TT	control
CC	GA	CC	control
CC	GG	CT	control
CA	AA	CC	control
CA	AA	CC	control
CA	GG	CC	control
CA	GG	CC	control
CA	AA	CC	control
CA	AA	CC	control
CA	GA	CT	control
CA	GA	CT	control
CA	AA	CC	control
CC	AA	CC	control
CC	GA	CC	control
CC	GA	CC	control
CC	GG	CT	control
CC	GG	CC	control
CA	GA	CT	control
CA	GA	CC	control
CC	GG	CT	control
CC	GA	CT	control
CA	GA	CC	control
